# Supplementary material
Source: publisher figshare collection journal article supplement (https://acs.figshare.com/ndownloader/files/3786826)
Supplement: Supplementary file 1 [file 3786826]

# Acid Strength Controlled Reaction Pathways for the Catalytic Cracking of 1-Pentene to Propene over ZSM-5

*Long F. Lin, Shu F. Zhao, Da W. Zhang, Hui Fan, Yue M. Liu<sup>\*</sup>, Ming Y. He*

Shanghai Key Laboratory of Green Chemistry and Chemical Processes, Department of Chemistry, East China Normal University, North Zhongshan Road 3663, Shanghai 200062, People's Republic of China

Corresponding author.

Prof. Yueming Liu

Corresponding Address:

Shanghai Key Laboratory of Green Chemistry and Chemical Processes, Department of Chemistry, East China Normal University, North Zhongshan Road 3663, Shanghai 200062, People's Republic of China

Tel: +86-21-6223-2058

Fax: +86-21-6223-2058

E-mail address: [ymliu@chem.ecnu.edu.cn](mailto:ymliu@chem.ecnu.edu.cn) (Y.M. Liu).

### **The conservation of mass and carbon atoms**

Since in theoretical analysis, the foundation was the law of conservation of carbon atoms, practically, it was necessary to demonstrate the conservation of mass before and after reactions. Figure S1 showed TG curves of five ZSM-5(142) samples after reactions at different temperature. There were two kinds of desorption temperature-dependent weight loss, ranging from 200 to 350 °C and from 500 to 700 °C which were attributed to soft coke and refractory coke respectively [1, 2]. From the TG curves (Figure S1), the amounts of the formed coke on the five samples were all small ( $< 3\%$ ). Therefore coke was neglected when we verified the law of conservation of mass. Table S1 showed carbon atom and the total mass conservation before and after catalytic cracking of 1-pentene over ZSM-5(142) at different temperature. At the reaction temperatures from 450 to 550 °C, the total mass of output was around  $7 \text{ g h}^{-1}$  which was consistent with the input ( $7.121 \text{ g h}^{-1}$ ). In addition, the carbon atom of input was  $0.509 \text{ mol h}^{-1}$ , while the output from 450 to 550 °C were 0.493, 0.488, 0.502, 0.494 and  $0.487 \text{ mol h}^{-1}$  respectively, clearly demonstrating the conservation of carbon atom. It was found that the output mass were always a little smaller than the input mass. This missing mass should be caused by a small coke formation. The coke yields were 2.9%, 3.7%, 1.0%, 2.7% and 3.9%, respectively, which were consistent with the results from TG curves (Figure S1).

Before verifying the effect of acid strength, it is also necessary to demonstrate the conservation of mass and carbon atoms. From TG curves (Figure S2), we can see that the amounts of the formed coke on the five samples were all small ( $< 3\%$ ). So we

would not take the coke formation into account when demonstrating the conservation of mass and carbon atoms. Table S2 showed carbon atom and the total mass conservation before and after catalytic cracking of 1-pentene over Z-1 – Z-5. The input carbon atoms and input total mass were  $0.509 \text{ mol h}^{-1}$  and  $7.121 \text{ g h}^{-1}$  respectively. The output carbon atoms over Z-1 – Z-5 were 0.498, 0.505, 0.481, 0.493 and  $0.486 \text{ mol h}^{-1}$  respectively, which fitted well with the input value. The output total mass was close to  $7.121 \text{ g h}^{-1}$ , clearly demonstrating the conservation of mass. A little lower output mass than input mass was also caused by coke formation, and the coke yields were 1.8%, 0.4%, 5.1%, 2.9% and 4.1%, respectively, which were consistent with the results from TG curves (Figure S2).

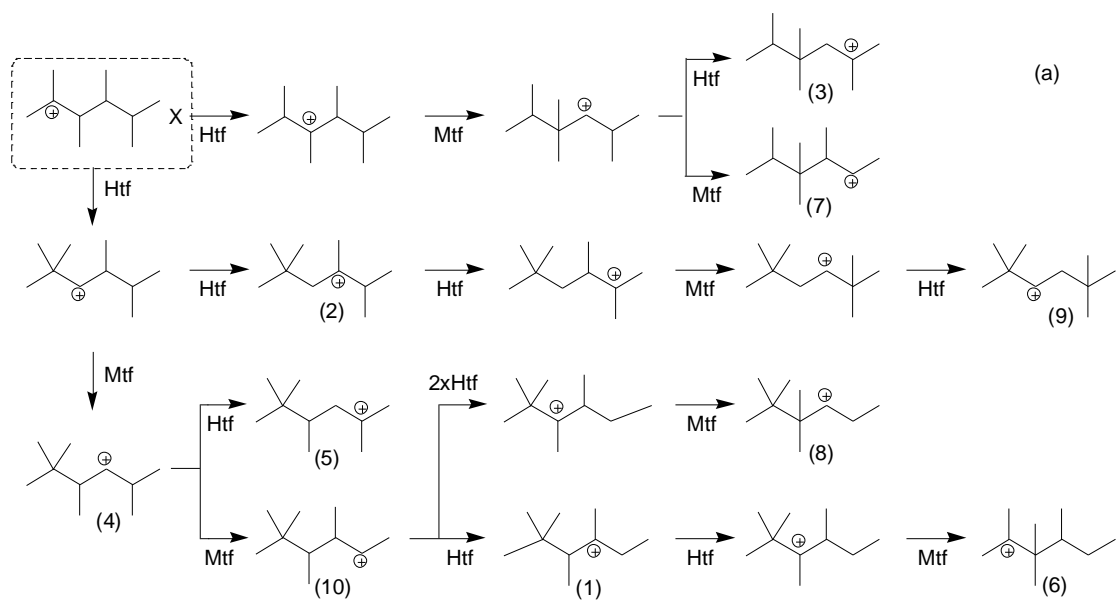

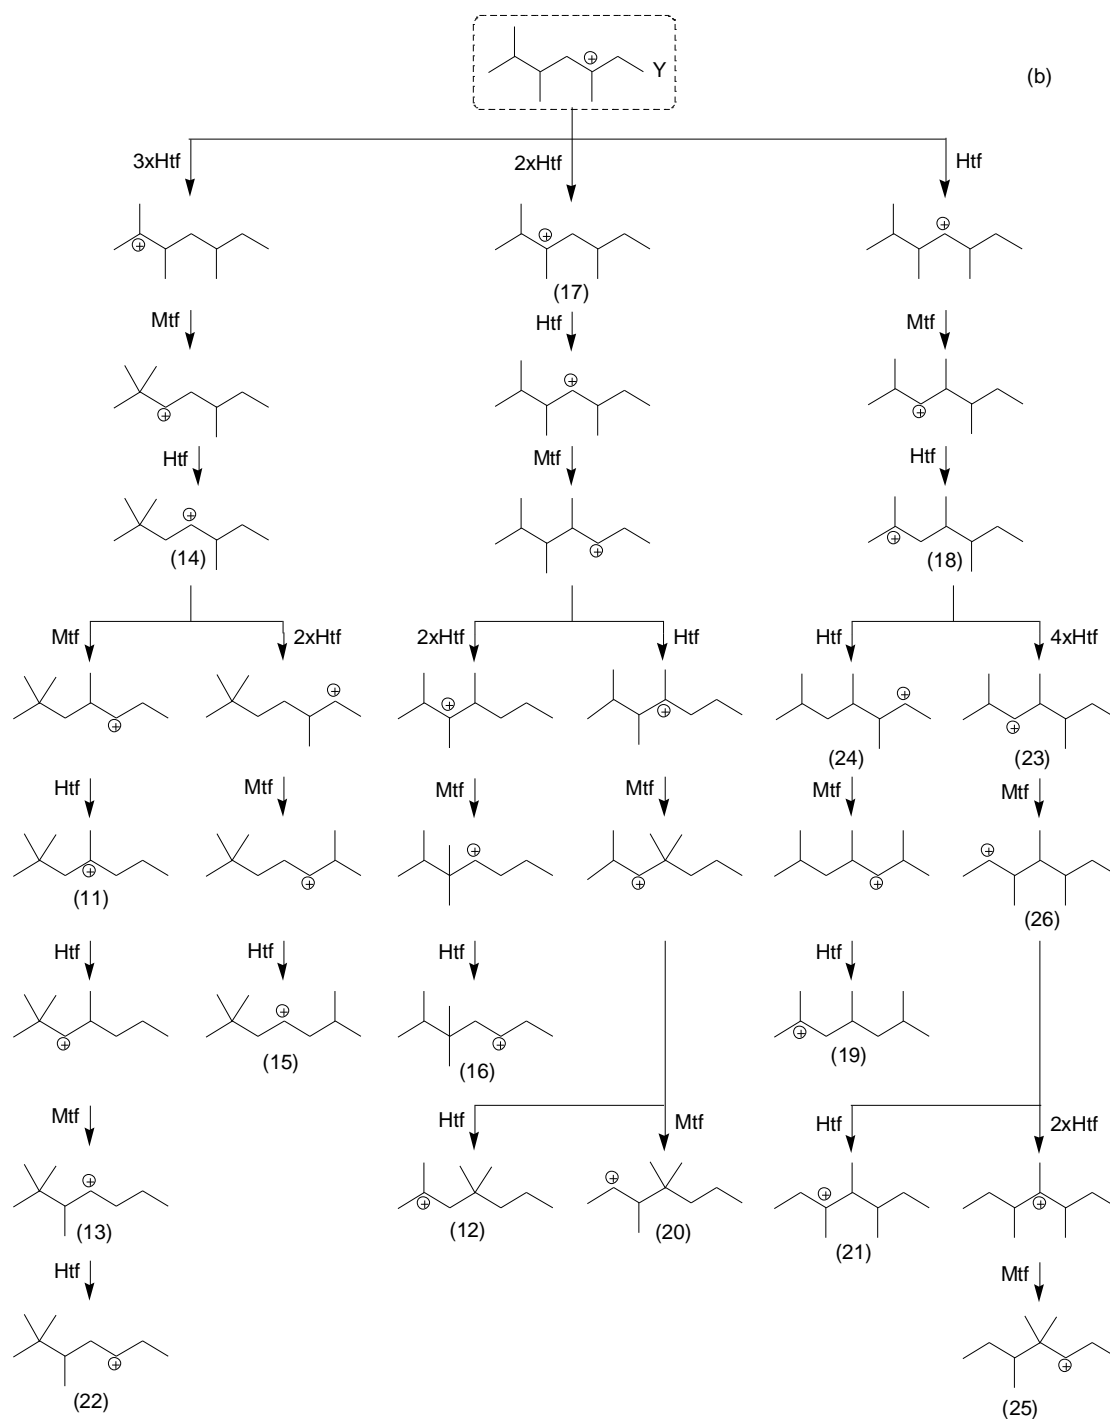

**Scheme S1.** Reaction Scheme of Formation of Various Decyl Carbenium Ions for the Production of Butenes and Hexenes through Type A, B or C B-Scission over ZSM-5:

(a) Isomerization of Decyl Carbenium X, (b) Isomerization of Decyl Carbenium Y<sup>a</sup>.

<sup>a</sup>Abbreviations: Htf, hydrogen transfer; Mtf, methyl transfer.

**Table S1.** Conservation of Carbon Atom and Mass before and after Catalytic Cracking of 1-Pentene over ZSM-5(142) at Different Temperatures<sup>a</sup>.

| T<br>(°C) | carbon atom (mol h <sup>-1</sup> ) |        | mass (g h <sup>-1</sup> ) |        |
|-----------|------------------------------------|--------|---------------------------|--------|
|           | input                              | output | input                     | output |
| 450       | 0.509                              | 0.493  | 7.121                     | 6.918  |
| 475       | 0.509                              | 0.488  | 7.121                     | 6.858  |
| 500       | 0.509                              | 0.502  | 7.121                     | 7.052  |
| 525       | 0.509                              | 0.494  | 7.121                     | 6.932  |
| 550       | 0.509                              | 0.487  | 7.121                     | 6.841  |

<sup>a</sup>Reaction conditions: cat., 1.0 g; pressure, 0.1 MPa; 1-pentene flow rate, 0.2 mL min<sup>-1</sup>; N<sub>2</sub> flow rate, 320 mL min<sup>-1</sup>; WHSV, 7.68 h<sup>-1</sup>; TOS = 0.5 h.

**Table S2.** Conservation of Carbon Atom and Mass before and after Catalytic Cracking of 1-Pentene over Z-1 – Z-5<sup>a</sup>.

| zeolite | carbon atom (mol h <sup>-1</sup> ) |        | mass (g h <sup>-1</sup> ) |        |
|---------|------------------------------------|--------|---------------------------|--------|
|         | input                              | output | input                     | output |
| Z-1     | 0.509                              | 0.498  | 7.121                     | 6.995  |
| Z-2     | 0.509                              | 0.505  | 7.121                     | 7.095  |
| Z-3     | 0.509                              | 0.481  | 7.121                     | 6.760  |
| Z-4     | 0.509                              | 0.493  | 7.121                     | 6.918  |
| Z-5     | 0.509                              | 0.486  | 7.121                     | 6.828  |

<sup>a</sup>Reaction conditions: cat., 1.0 g; temp., 450 °C; pressure, 0.1 MPa; 1-pentene flow rate, 0.2 mL min<sup>-1</sup>; N<sub>2</sub> flow rate, 320 mL min<sup>-1</sup>; WHSV, 7.68 h<sup>-1</sup>; TOS = 0.5 h.

**Table S3.** Results of Catalytic Cracking of 1-Butene at Different Temperature over Z-1<sup>a</sup>.

| T<br>(°C) | conv.(C <sub>4</sub> <sup>+</sup> )<br>(mol %) | sel. (mol %)                |                             |                             |                             |                                                           |                                                           |                |      | P/E<br>(mol) |
|-----------|------------------------------------------------|-----------------------------|-----------------------------|-----------------------------|-----------------------------|-----------------------------------------------------------|-----------------------------------------------------------|----------------|------|--------------|
|           |                                                | C <sub>2</sub> <sup>=</sup> | C <sub>3</sub> <sup>=</sup> | C <sub>5</sub> <sup>=</sup> | C <sub>6</sub> <sup>=</sup> | C <sub>1</sub> <sup>0</sup> + C <sub>2</sub> <sup>0</sup> | C <sub>3</sub> <sup>0</sup> - C <sub>5</sub> <sup>0</sup> | H <sub>2</sub> | arom |              |
| 450       | 64.7                                           | 10.6                        | 59.9                        | 14.7                        | 6.2                         | 0.1                                                       | 6.8                                                       | 0.4            | 1.3  | 5.7          |
| 500       | 55.7                                           | 14.4                        | 60.5                        | 14.2                        | 4.2                         | 0.3                                                       | 5.2                                                       | 0.5            | 0.8  | 4.2          |
| 550       | 46.5                                           | 18.3                        | 59.0                        | 13.7                        | 3.4                         | 0.6                                                       | 4.0                                                       | 0.6            | 0.4  | 3.2          |

<sup>a</sup>Reaction conditions: cat., Z-1, 1.0 g; pressure, 0.1 MPa; 1-butene flow rate, 40 mL min<sup>-1</sup>; N<sub>2</sub> flow rate, 320 mL min<sup>-1</sup>; WHSV, 6.0 h<sup>-1</sup>; TOS = 1.5 h.



**Table S4.** Results of Catalytic Cracking of 1-Pentene at Different Temperature over Z-1<sup>a</sup>.

| T<br>(°C) | conv.(C <sub>5</sub> <sup>=</sup> )<br>(mol %) | sel. (mol %)                |                             |                             |                             |                                                           |                                                           |                |      | P/E   | P/B   |
|-----------|------------------------------------------------|-----------------------------|-----------------------------|-----------------------------|-----------------------------|-----------------------------------------------------------|-----------------------------------------------------------|----------------|------|-------|-------|
|           |                                                | C <sub>2</sub> <sup>=</sup> | C <sub>3</sub> <sup>=</sup> | C <sub>4</sub> <sup>=</sup> | C <sub>6</sub> <sup>=</sup> | C <sub>1</sub> <sup>0</sup> + C <sub>2</sub> <sup>0</sup> | C <sub>3</sub> <sup>0</sup> - C <sub>5</sub> <sup>0</sup> | H <sub>2</sub> | arom | (mol) | (mol) |
| 400       | 78.6                                           | 7.5                         | 33.8                        | 34.4                        | 9.7                         | 0.1                                                       | 10.1                                                      | 0.5            | 3.8  | 4.5   | 1.0   |
| 450       | 85.2                                           | 12.2                        | 41.8                        | 31.3                        | 5.6                         | 0.1                                                       | 6.9                                                       | 0.4            | 1.8  | 3.4   | 1.3   |
| 500       | 86.7                                           | 27.2                        | 41.0                        | 24.2                        | 2.4                         | 0.3                                                       | 3.3                                                       | 0.5            | 1.2  | 1.5   | 1.7   |

<sup>a</sup>Reaction conditions: cat., Z-1, 1.0 g; pressure, 0.1 MPa; 1-pentene flow rate, 0.2 mL min<sup>-1</sup>; N<sub>2</sub> flow rate, 320 mL min<sup>-1</sup>; WHSV, 7.68 h<sup>-1</sup>; TOS = 0.5 h.

**Table S5.** Reaction Results of Catalytic Cracking of Different Feedstock over Z-1.

| feedstock            | conv.(C <sub>4</sub> <sup>≡</sup> )<br>(mol %) | conv.(C <sub>5</sub> <sup>≡</sup> )<br>(mol %) | sel. (mol %)                |                             |                             |                             |                             |                               |     |                                                           | P/E<br>(mol) |                |       |
|----------------------|------------------------------------------------|------------------------------------------------|-----------------------------|-----------------------------|-----------------------------|-----------------------------|-----------------------------|-------------------------------|-----|-----------------------------------------------------------|--------------|----------------|-------|
|                      |                                                |                                                | C <sub>2</sub> <sup>=</sup> | C <sub>3</sub> <sup>=</sup> | C <sub>4</sub> <sup>=</sup> | C <sub>5</sub> <sup>=</sup> | C <sub>6</sub> <sup>=</sup> | C <sub>1</sub> <sup>0</sup> + |     | C <sub>3</sub> <sup>0</sup> – C <sub>5</sub> <sup>0</sup> |              | H <sub>2</sub> | arom. |
|                      |                                                |                                                |                             |                             |                             |                             |                             | C <sub>2</sub> <sup>0</sup>   |     |                                                           |              |                |       |
| Butene <sup>a</sup>  | 55.7                                           | —                                              | 14.4                        | 60.5                        | —                           | 14.2                        | 4.2                         | 0.3                           | 5.2 | 0.5                                                       | 0.9          | 4.2            |       |
| Pentene <sup>b</sup> | —                                              | 86.7                                           | 27.2                        | 41.0                        | 24.2                        | —                           | 2.4                         | 0.3                           | 3.3 | 0.5                                                       | 0.9          | 1.5            |       |

<sup>a</sup>Reaction conditions: cat., Z-1, 1.0 g; temp., 500 °C; pressure, 0.1 MPa; 1-butene flow rate, 40 mL min<sup>-1</sup>; N<sub>2</sub> flow rate, 320 mL min<sup>-1</sup>; TOS = 1.5 h.

<sup>b</sup>Reaction conditions: cat., Z-1, 1.0 g; temp., 500 °C; pressure, 0.1 MPa; 1-pentene flow rate, 0.2 mL min<sup>-1</sup>; N<sub>2</sub> flow rate, 320 mL min<sup>-1</sup>; TOS = 0.5 h.

**Table S6.** Results of Catalytic Cracking of 1-Butene at Different Temperature over Z-5<sup>a</sup>.

| T<br>(°C) | conv.(C <sub>4</sub> <sup>+</sup> )<br>(mol %) | sel. (mol %)                |                             |                             |                             |                                                           |                                                           |                |       | P/E<br>(mol) |
|-----------|------------------------------------------------|-----------------------------|-----------------------------|-----------------------------|-----------------------------|-----------------------------------------------------------|-----------------------------------------------------------|----------------|-------|--------------|
|           |                                                | C <sub>2</sub> <sup>=</sup> | C <sub>3</sub> <sup>=</sup> | C <sub>5</sub> <sup>=</sup> | C <sub>6</sub> <sup>=</sup> | C <sub>1</sub> <sup>0</sup> + C <sub>2</sub> <sup>0</sup> | C <sub>3</sub> <sup>0</sup> – C <sub>5</sub> <sup>0</sup> | H <sub>2</sub> | arom. |              |
| 400       | 77.7                                           | 14.8                        | 36.5                        | 9.5                         | 8.9                         | 0.3                                                       | 23.9                                                      | 1.0            | 5.2   | 2.5          |
| 450       | 80.3                                           | 22.8                        | 39.5                        | 5.8                         | 4.9                         | 0.7                                                       | 19.2                                                      | 1.7            | 5.3   | 1.7          |
| 500       | 81.5                                           | 29.5                        | 42.6                        | 3.6                         | 2.9                         | 1.4                                                       | 12.6                                                      | 2.8            | 4.7   | 1.5          |
| 550       | 85.2                                           | 34.6                        | 39.7                        | 1.7                         | 1.4                         | 2.7                                                       | 9.2                                                       | 5.1            | 5.7   | 1.2          |

<sup>a</sup>Reaction conditions: cat., Z-5, 1.0 g; pressure, 0.1 MPa; 1-butene flow rate, 40 mL min<sup>-1</sup>; N<sub>2</sub> flow rate, 320 mL min<sup>-1</sup>; WHSV, 6.0 h<sup>-1</sup>; TOS = 1.5 h.

**Table S7.** Results of Catalytic Cracking of 1-Pentene at Different Temperature over Z-5<sup>a</sup>.

| T<br>(°C) | conv.(C <sub>5</sub> <sup>=</sup> )<br>(mol %) | sel. (mol %)                |                             |                             |                             |                                                           |                                                           |                |       | P/E<br>(mol) | P/B<br>(mol) |
|-----------|------------------------------------------------|-----------------------------|-----------------------------|-----------------------------|-----------------------------|-----------------------------------------------------------|-----------------------------------------------------------|----------------|-------|--------------|--------------|
|           |                                                | C <sub>2</sub> <sup>=</sup> | C <sub>3</sub> <sup>=</sup> | C <sub>4</sub> <sup>=</sup> | C <sub>6</sub> <sup>=</sup> | C <sub>1</sub> <sup>0</sup> + C <sub>2</sub> <sup>0</sup> | C <sub>3</sub> <sup>0</sup> - C <sub>5</sub> <sup>0</sup> | H <sub>2</sub> | arom. |              |              |
| 450       | 94.1                                           | 20.5                        | 31.3                        | 17.5                        | 4.3                         | 0.7                                                       | 18.5                                                      | 2.1            | 5.0   | 1.5          | 1.8          |
| 500       | 96.1                                           | 27.9                        | 30.8                        | 12.4                        | 1.8                         | 1.9                                                       | 13.7                                                      | 4.5            | 7.3   | 1.1          | 2.5          |
| 550       | 98.3                                           | 37.2                        | 27.7                        | 7.6                         | 0.4                         | 4.6                                                       | 8.7                                                       | 8.9            | 4.9   | 0.7          | 3.7          |

<sup>a</sup>Reaction conditions: cat., Z-5, 1.0 g; pressure, 0.1 MPa; 1-pentene flow rate, 0.2 mL min<sup>-1</sup>; N<sub>2</sub> flow rate, 320 mL min<sup>-1</sup>; WHSV, 7.68 h<sup>-1</sup>; TOS = 0.5 h.

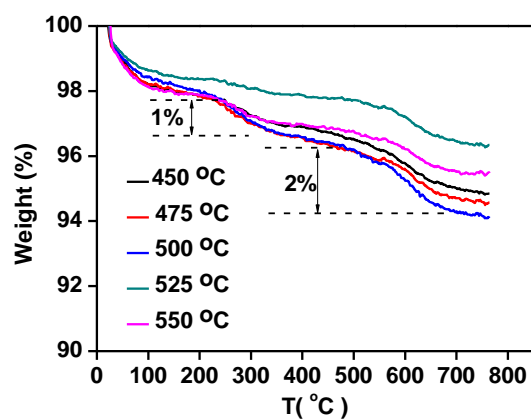

**Figure S1.** TG Curves of ZSM-5(142) Zeolites Which Have Been Used in the Catalytic Cracking of 1-Pentene for 1.5 h at 450 to 550 °C.

Reaction conditions: cat., 1.0 g; pressure, 0.1 MPa; 1-pentene flow rate, 0.2 mL min<sup>-1</sup>;

N<sub>2</sub> flow rate, 320 mL min<sup>-1</sup>; WHSV, 7.68 h<sup>-1</sup>.

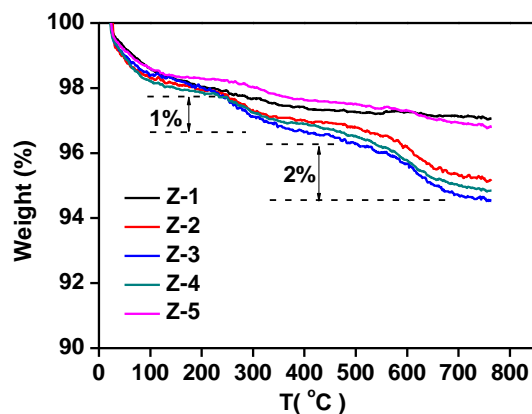

**Figure S2.** TG Curves of Z-1 – Z-5 Which Have Been Used in the Catalytic Cracking of 1-Pentene for 1.5 h.

Reaction conditions: cat., 1.0 g; temp., 450 °C; pressure, 0.1 MPa; 1-pentene flow rate, 0.2 mL min<sup>-1</sup>; N<sub>2</sub> flow rate, 320 mL min<sup>-1</sup>; WHSV, 7.68 h<sup>-1</sup>.

## REFERENCES

- [1] Zhang, X. J.; Wang, Y.; Xin, F. *Appl. Catal. A Gen.* **2006**, 307, 222-230.
- [2] Ibáñez, M.; Artetxe, M.; Lopez, G.; Elordi, G.; Bilbao, J.; Olazar, M.; Castaño, P. *Appl. Catal. B: Environ.* **2014**, 148-149, 436-445.
